# Supplementary material for: Human Matching Behavior in Social Networks: An Algorithmic Perspective
Source: PubMed Central journal article supplement (PMC3425504; doi:10.1371/journal.pone.0041900), 2012-08-22
Supplement: pone.0041900.s002.pdf [file pone.0041900.s002.pdf]

# Human matching behavior in social networks: an algorithmic perspective – Proofs of the Theorems

Lorenzo Coviello<sup>1,\*</sup>, Massimo Franceschetti<sup>1</sup>, Mathew McCubbins<sup>2</sup>, Ramamohan Paturi<sup>3</sup>, Andrea Vattani<sup>3</sup>

**1** Department of Electrical and Computer Engineering, University of California San Diego, CA

**2** Department of Political Science, University of Southern California, Los Angeles, CA

**3** Department of Computer Science and Engineering, University of California San Diego, CA

\* E-mail: [lcoviell@ucsd.edu](mailto:lcoviell@ucsd.edu)

## Proof of Theorem 1.

For ease of presentation, we assume  $p = 0$ , and remark that this result holds for all choices of  $0 \leq p < 1$ . Let  $G$  be a graph of  $n$  nodes and maximum degree  $\Delta$ . Let  $m$  be the number of matched nodes in the smallest maximal matching of  $G$ . For  $t \geq 0$ , denote by  $W_t$  the set of nodes of  $G$  which are unmatched and have at least an unmatched neighbor at the beginning of round  $t$ , and let  $|W_t|$  be the cardinality of  $W_t$ . Also, let  $M_t$  be the matching of  $G$  obtained by the PRUDENCE algorithm at the beginning of round  $t$  and  $N_t$  be the number of nodes matched by  $M_t$ . For  $t \geq 0$ , define the random variable

$$D_t = m - N_t.$$

We devote the rest of the proof to showing that

$$E[D_t] \leq (1 - (\Delta + 1)^{-3})^t E[D_0] \tag{1}$$

The theorem then follows by the observations that  $E[D_0] \leq n$  and that any maximal matching is at least a 1/2-approximation of the maximum matching.

To prove (1), we will first show that  $E[B_t(W_t)|W_t] \geq (\Delta + 1)^{-3}|W_t|$ , where  $B_t(W_t)$  is the number of nodes in  $W_t$  that match with nodes in  $W_t$  during round  $t$  (here the expectation is taken over the randomness of the algorithm during round  $t$ ). For  $u \in W_t$ , let  $Z_t(u)$  be the indicator random variable that takes value 1 if and only if  $u$  gets matched with a node in  $W_t$  during round  $t$ . By linearity of expectation, we have that

$$E[B_t(W_t)|W_t] = \sum_{u \in W_t} E[Z_t(u)] = \sum_{u \in W_t} \Pr(Z_t(u) = 1).$$

Let  $A_t$  be the set of nodes  $u \in W_t$  such that (i)  $u$  has no incoming or outgoing request to nodes in  $W_t$ , and (ii) all neighbors  $v \in W_t$  of  $u$  have an incoming request. Let  $\bar{A}_t = W_t \setminus A_t$ . For  $u \in A_t$ , we have that  $\Pr(Z_t(u) = 1) = 0$ , as unmatched nodes prefer neighbors who requested them over other unmatched neighbors. On the other hand, for  $u \in \bar{A}_t$ , we have  $\Pr(Z_t(u) = 1) \geq \Delta^{-2}$ . To see this, note that a pending request involving  $u$  (if any) will be honored with probability at least  $\Delta^{-2}$ ; if no such request exists, the co-occurrence of the event of  $u$  requesting a neighbor with no incoming request and of that neighbor requesting  $u$  happens with probability at least  $\Delta^{-2}$ . By definition of  $A_t$ , no two nodes in  $A_t$  can be neighbors. Also, by definition of  $W_t$ , every node  $u \in W_t$  has at least one neighbor in  $W_t$ . These two facts imply that  $|\bar{A}_t| \geq (\Delta + 1)^{-1}|W_t|$ . We can conclude that  $E[B_t(W_t)|W_t] \geq (\Delta + 1)^{-3}|W_t|$ .

We now relate  $D_{t+1}$  to  $B_t(W_t)$ . First, note that  $D_{t+1} \leq D_t - B_t(W_t)$ . By itself, this bound is not strong as  $W_t$  can be small. However, when  $W_t$  is small, the current matching must be close to a maximal matching. Indeed, by considering the union of  $M_t$  and any maximal matching of  $W_t$ , we have that

$m \leq N_t + |W_t|$ . This implies that  $D_t = m - N_t \leq |W_t|$  and hence  $D_{t+1} \leq D_t - B_t(W_t) \leq |W_t| - B_t(W_t)$ . Therefore, we have

$$\begin{aligned} D_{t+1} &\leq D_t - B_t(W_t), \\ D_{t+1} &\leq |W_t| - B_t(W_t). \end{aligned}$$

By taking the expectations with respect to the randomness of the algorithm during round  $t$ , we get

$$\begin{aligned} E[D_{t+1}|W_t, D_t] &\leq D_t - E[B_t(W_t)|W_t] \leq D_t - (\Delta + 1)^{-3}|W_t|, \\ E[D_{t+1}|W_t, D_t] &\leq |W_t| - E[B_t(W_t)|W_t] \leq |W_t| - (\Delta + 1)^{-3}|W_t| = (1 - (\Delta + 1)^{-3})|W_t|. \end{aligned}$$

Now, by taking the expectation with respect to the randomness of the algorithm during rounds up to  $t$ , we obtain

$$\begin{aligned} E[D_{t+1}] &\leq E[D_t] - (\Delta + 1)^{-3}E[|W_t|], \\ E[D_{t+1}] &\leq (1 - (\Delta + 1)^{-3})E[|W_t|]. \end{aligned}$$

Letting  $d_t = E[D_t]$ ,  $w_t = E[|W_t|]$ , and  $\alpha = (\Delta + 1)^{-3}$ , the bounds above can be rewritten as

$$d_{t+1} \leq \min \{d_t - \alpha w_t, (1 - \alpha)w_t\}.$$

To conclude the proof of (1), we show by induction that  $d_t \leq d_0(1 - \alpha)^t$ . For  $t = 0$ , as  $d_0 \leq w_0$ , we have  $d_1 \leq d_0 - \alpha w_0 \leq (1 - \alpha)w_0$ . Now, let us consider any  $t \geq 1$  and distinguish between the cases of  $w_t \leq d_0(1 - \alpha)^t$  and  $w_t > d_0(1 - \alpha)^t$ . If  $w_t \leq d_0(1 - \alpha)^t$ , we have  $d_{t+1} \leq (1 - \alpha)w_t \leq d_0(1 - \alpha)^{t+1}$ . Otherwise, if  $w_t > d_0(1 - \alpha)^t$ , using the induction hypothesis, we have that

$$d_{t+1} \leq d_t - \alpha w_t \leq d_0(1 - \alpha)^t - \alpha w_t \leq d_0(1 - \alpha)^t - d_0\alpha(1 - \alpha)^t = d_0(1 - \alpha)^{t+1},$$

which completes the proof.

## Proof of Theorem 2.

For ease of presentation, we assume  $p = 0$ , and remark that this result holds for all choices of  $0 \leq p < 1$ . Let  $G$  be a graph of  $n$  nodes, maximum degree  $\Delta$ , and maximum matching of size  $\text{OPT}$ . We will consider the unmatched nodes as *particles* randomly moving on the nodes of the network as per the algorithm choices. To see how the particle move, consider the particle positioned at any unmatched node  $u$ . If  $u$  requests a matched neighbor  $v$  and  $v$  accepts the requests, then the particle will move to  $v$ 's old partner (which is left unmatched). If  $u$  requests an unmatched neighbor  $z$  and  $z$  accepts the request, then both the particles at  $u$  and  $z$  will dissolve. Note that when two particles dissolve the size of the matching increases by one.

An augmenting path is a path of odd length which alternates matched and unmatched edges and whose extreme edges are unmatched. Observe that by switching each unmatched edge of an augmenting path into a matched edge, and viceversa, the size of the matching increases by one.

We split the rounds into epochs of  $\lceil 1/\epsilon \rceil$  rounds each. We claim that if at the beginning of any epoch the size of the matching is less than a  $(1 - \epsilon)\text{OPT}$ , then the size of the matching increases by at least one by the end of that epoch with probability at least  $\Delta^{-2/\epsilon}$ . To prove the claim, consider the first round of any epoch and let  $u_0, u_1, \dots, u_\ell$  be any *shortest* augmenting path at the beginning of that round. It must be that  $\ell < 2(\epsilon^{-1} - 1)$ , otherwise Lemma 1 would imply that the size of the matching is at least a  $\frac{\ell+1}{\ell+3} \geq 1 - \epsilon$  fraction of  $\text{OPT}$ . For  $\ell = 1$ ,  $u_0$  and  $u_1$  will match with each other during the first round with probability at least  $\Delta^{-2}$ , hence the claim is true. For  $\ell = 3$ ,  $u_0$  and  $u_3$  will request respectively

$u_1$  and  $u_2$  with probability at least  $\Delta^{-2}$  during the first round of the epoch, and these requests will be accepted in the second round with probability at least  $\Delta^{-2}$  — hence, the size of the matching increases by one within 2 rounds with probability at least  $\Delta^{-4}$ . Now consider  $5 \leq \ell < 2(\epsilon^{-1} - 1)$ . We have that two particles occupy the nodes  $u_0$  and  $u_\ell$  at the extremes of the augmenting path. With probability at least  $\Delta^{-2}$ ,  $u_0$  requests to match with  $u_1$  during the first round and  $u_1$  accepts in the second round, making the corresponding particle move from  $u_0$  to  $u_2$ . A similar argument yields that the particle at  $u_\ell$  moves to  $u_{\ell-2}$  within two rounds with probability at least  $\Delta^{-2}$ . Moreover, as the augmenting path under consideration is a shortest augmenting path, nodes  $u_2, \dots, u_{\ell-2}$  have no unmatched neighbors at the beginning of the first round and hence do not receive any matching request during that round. Therefore, with probability at least  $\Delta^{-4}$ , at the end of the second round the nodes  $u_2$  and  $u_{\ell-2}$  are unmatched whereas nodes  $u_3, \dots, u_{\ell-3}$  did not change their partner. That is, the length of the shortest path at the beginning of the third round of the epoch is at most  $\ell - 4$  with probability at least  $\Delta^{-4}$ . By means of the same argument, we can conclude that with probability at least  $(\Delta^{-4})^{\ell/4} > \Delta^{-2/\epsilon}$ , all nodes in an augmenting path are matched within  $\ell/2 \leq \lfloor 1/\epsilon \rfloor$  rounds, which proves the claim.

For any epoch  $i$ , we now associate a binary random variable  $X_i$  which takes on value 1 with probability  $p = \Delta^{-2/\epsilon}$ . The claim guarantees that the size of the matching after  $T$  epochs is at least  $\min\{(1 - \epsilon)\text{OPT}, \sum_{i=1}^T X_i\}$ . Also, as successive rounds of the algorithm are independent, the  $X_i$ 's are independent random variables. For any  $0 < \delta \leq 1$ , the Chernoff bound states that

$$\Pr \left[ \sum_{i=1}^T X_i < (1 - \delta)Tp \right] < \exp(-T\delta^2/2).$$

For any  $c \geq 1/2$ , by setting  $T := cn\Delta^{-2/\epsilon}$  and  $\delta := \epsilon$ , the above yields that the size of the matching after  $T$  epochs (i.e., after  $T\lfloor 1/\epsilon \rfloor \leq \frac{c}{\epsilon}n\Delta^{2/\epsilon}$  rounds) is at least  $\min\{(1 - \epsilon)\text{OPT}, (1 - \epsilon)cn\} = (1 - \epsilon)\text{OPT}$  with probability at least  $1 - \exp(-c\epsilon^2n/2)$ .

## Proof Theorem 3.

### Analysis.

For ease of presentation, we assume  $p = 0$ , and remark that this result holds for all choices of  $0 \leq p < 1$ . We say that the nodes  $\{a_i : 1 \leq i \leq n\} \cup \{b_i : 1 \leq i \leq n\}$  constitute the upper half of  $G_n$ , and the remaining ones constitute the lower half of  $G_n$ . Let  $\mathcal{M} = \mathcal{M}_1 \cup \mathcal{M}_2$  be the set of all matchings of  $G_n$  of size  $2n - 1$ , where  $\mathcal{M}_1$  is the set of matchings of size  $2n - 1$  in which the two unmatched nodes are in opposite halves of  $G_n$ , and  $\mathcal{M}_2 = \mathcal{M} \setminus \mathcal{M}_1$  are the remaining ones.

Our goal is to show that the PRUDENCE algorithm requires  $2^{\Omega(n/\log^2 n)}$  rounds with high probability to reach the perfect matching of  $G_n$  when starting from any matching in  $\mathcal{M}_1$ . We first prove certain properties for the matchings in  $\mathcal{M}_1$ . We then establish a correspondence between the Markov chain over matchings induced by the PRUDENCE algorithm and a classical random walk on the tree  $T_n^*$ . In particular, we show that the hitting time of the root of  $T_n^*$  is a lower bound on the number of rounds to reach the perfect matching of  $G_n$ .

### Properties of matchings in $\mathcal{M}_1$ .

We begin by characterizing the matchings in  $\mathcal{M}_1$ .

**Lemma 1** *Consider any matching  $M \in \mathcal{M}_1$ , and let  $a_k, b_\ell$  be the unmatched nodes in the upper and lower half of  $G_n$ , respectively. Then, the following properties hold:*

1. *For all  $i < k$  and  $i > \ell$ , the matching  $M$  contains the edges  $(a_i, b_i)$ .*

2. If  $k < n$ ,  $M$  contains the edge  $(a_n, b_j)$  for some  $1 \leq j < n$ . Similarly, if  $\ell > n + 1$ ,  $M$  contains the edge  $(a_i, b_{n+1})$  for some  $n + 1 < i \leq 2n$ . That is, the nodes  $a_n$  and  $b_{n+1}$  can be matched only through non-horizontal edges.
3. If in its upper half  $M$  contains a pair of edges  $(a_{i_1}, b_{j_1}), (a_{i_2}, b_{j_2})$  with  $i_1 \neq j_1, i_2 \neq j_2$ , and  $1 \leq i_1 < i_2 \leq n$ , then  $1 \leq k \leq j_1 < i_1 \leq j_2 < i_2 \leq n$ . Similarly, if in its lower half  $M$  contains a pair of edges  $(a_{i_1}, b_{j_1}), (a_{i_2}, b_{j_2})$  with  $i_1 \neq j_1, i_2 \neq j_2$ , and  $n + 1 \leq j_1 < j_2 \leq 2n$ , then  $n + 1 \leq j_1 < i_1 \leq j_2 < i_2 \leq \ell \leq 2n$ . That is, non-horizontal matching edges do not cross.

**Proof.** To prove the first property, we show that  $(a_i, b_i) \in M$  for all  $i < k$  (the claim for  $i > \ell$  can be proven in the same way). We show by induction on  $1 \leq j \leq k - 1$  that  $(a_i, b_i) \in M$  for all  $i \leq j$ . For  $j = 1$ , we have that  $a_1$  must be matched to  $b_1$  (its only neighbor), and therefore the claim holds true. Suppose the claim holds true for some  $j < k - 1$ . By the inductive assumption we have that  $(a_i, b_i) \in M$  for all  $i \leq j$ . As  $(a_{j+1}, b_i) \in E$  if and only if  $i \leq j + 1$ ,  $a_{j+1}$  must be matched to  $b_{j+1}$ , and therefore the claim holds for  $j + 1$ .

The second property follows by observing that  $M \in \mathcal{M}_1$  implies that the bridge edge  $(a_{n+1}, b_n)$  is in  $M$ , and therefore  $a_n$  cannot be matched to  $b_n$ , and  $a_{n+1}$  cannot be matched to  $b_{n+1}$  in  $M$ . To see this, suppose by contradiction that  $(a_{n+1}, b_n) \notin M$ . Then,  $b_n$  must be matched to  $a_n$  (its only neighbor besides  $a_{n+1}$ ), and a node in  $\{a_1, \dots, a_{n-1}\}$  is unmatched. Then, each of the  $n - 1$  nodes in  $\{b_1, \dots, b_{n+1}\}$  must be matched with one of the  $n - 2$  matched nodes in  $\{a_1, \dots, a_{n-1}\}$ , generating a contradiction. This implies that  $(a_{n+1}, b_n) \in M$ .

To prove the third property, assume that, in its upper half,  $M$  contains edges  $(a_{i_1}, b_{j_1}), (a_{i_2}, b_{j_2})$  with  $i_1 \neq j_1, i_2 \neq j_2$ , and  $1 \leq i_1 < i_2 \leq n$ . Then, it must be that  $j_1 < i_1$  and  $j_2 < i_2$ . Moreover, Property 1 implies that  $k \leq j_1$ . Therefore, it only remains to show that  $i_1 \leq j_2$ . Suppose by contradiction that  $i_1 > j_2$ . As  $i_1 > j_1 \geq k$  and  $j_1 \neq j_2$ , it must be that  $i_1 \geq k + 2$ . As  $b_{j_2}$  is matched to  $a_{i_2}$  and  $i_2 > i_1$ , we have that each of the  $i_1 - k \geq 2$  nodes in  $\{a_{k+1}, \dots, a_{i_1}\}$  must be matched to one of the  $i_1 - k - 1$  nodes in  $\{b_k, \dots, b_{i_1-1}\} \setminus \{b_{j_2}\}$ , generating a contradiction. This implies that  $i_1 \leq j_2$  and therefore  $1 \leq k \leq j_1 < i_1 \leq j_2 < i_2 \leq n$ . The claim in Property 3 regarding the lower half of  $M$  is similarly proved.  $\blacksquare$

It follows from Lemma 1 that a matching  $M \in \mathcal{M}_1$  can be uniquely reconstructed by specifying the two unmatched nodes and the nodes in  $\{a_1, \dots, a_n\} \cup \{b_{n+1}, \dots, b_{2n}\}$  whose matching edges are *non-horizontal*. To see this, consider the upper half of  $G_n$ : assume  $a_{j_0} \neq a_n$  is the unmatched node and  $S = \{j_1, \dots, j_m\}$ , with  $1 \leq j_0 < j_1 < j_2 < \dots < j_m = n$ , is the set of indexes of the left nodes whose matching edges are non-horizontal. (Note that  $n \in S$  by Lemma 1.) Then,  $j_0 < j_1$  and  $(a_i, b_i) \in M$  for all  $i$  such that  $i \notin S \cup \{j_0\}$  and  $1 \leq i \leq n$ . Hence, it necessarily holds that  $(a_{j_i}, b_{j_{i-1}}) \in M$  for all  $1 \leq i \leq m$ . This completes the construction of the matching in the upper half of  $G_n$ . A similar argument can be applied to the lower half. These two arguments imply the following lemma.

**Lemma 2** *There exists a bijection  $\psi$  between matchings in  $\mathcal{M}_1$  and elements of  $\mathcal{P} \times \mathcal{P}'$ , where*

$$\begin{aligned} \mathcal{P} &= \{(x, S) : x \in \{1, \dots, n - 1\}, \{n\} \subseteq S \subseteq \{x + 1, \dots, n\}\} \cup \{(n, \emptyset)\}, \\ \mathcal{P}' &= \{(y, S') : y \in \{n + 1, \dots, 2n\}, \{n + 1\} \subseteq S' \subseteq \{n + 1, \dots, y - 1\}\} \cup \{(n + 1, \emptyset)\}. \end{aligned}$$

### The tree $T_n^*$ .

**Definition 1** *Let  $T_1$  be a labelled rooted tree with a singleton node with label 1. Inductively, for  $2 \leq i \leq n - 1$ , let  $T_i$  be the labelled rooted tree whose root is labelled with  $i$  and its children are  $T_1, \dots, T_{i-1}$ . We define  $T_n^*$  to be the tree with an unlabelled root whose only child is  $T_n$  (also see Figure S1). Let  $r^*$  denote the root of  $T_n^*$ .*

We show that the hitting time of  $r^*$  when starting at any node  $u \neq r^*$  is exponential with high probability. For a node  $u \neq r^*$ , we call the edge that connects  $u$  to its parent  $u$ 's *exit* edge. For any subtree  $T_i \subset T_n^*$ , let  $Z_i$  be the random variable denoting the number of steps that it takes for a walk starting at the root of  $T_i$  to “exit”  $T_i$ . The following lemma provides an exponential lower bound on  $Z_i$

**Lemma 3** *There exist positive constants  $\alpha, \gamma > 0$  such that, for all  $i \geq 2$ ,*

$$\Pr[Z_i \geq \gamma \cdot 2^{i/(\alpha \log^2 i)}] \geq 1 - \frac{1}{\log i}.$$

**Proof.** We proceed by induction on  $i$ . For convenience, define  $g(i) = \alpha \log^2 i$  and  $f(i) = \gamma \cdot 2^{i/g(i)}$  for some  $\alpha, \gamma > 0$ . For any constant  $\alpha > 0$ , there exists a small enough constant  $\gamma > 0$  such that  $f(i) \leq 1$ ; therefore, as  $Z_i \geq 1$  with probability 1, the claim holds trivially for any  $i \leq i^*$ , where  $i^*$  is a suitable large constant.

Now consider any  $i \geq i^*$  and suppose the claim holds up to  $i - 1$ . Every time the walk is on the root of  $T_i$ , it exits  $T_i$  with probability  $1/i$ . Therefore, letting  $E_t$  be the event that the first  $t$  times the walk is on the root of  $T_i$  it does *not* exit  $T_i$ , we have  $\Pr[E_t] \geq 1 - t/i$ . Let  $t = i/(2 \log i)$ , and let  $D_j$ ,  $1 \leq j \leq t$ , be the event that, when it is on the root of  $T_i$  for the  $j$ -th time, the walk moves to the root of one of the subtrees  $T_{i-g(i)}, \dots, T_{i-1}$  and takes at least  $f(i - g(i))$  steps to exit that subtree. For  $1 \leq j \leq t$ , we have

$$\begin{aligned} \Pr[D_j \mid E_t] &\geq \frac{g(i)}{i} \cdot \Pr[Z_{i-g(i)} \geq f(i - g(i))] \\ &\geq \frac{g(i)}{i} \cdot \left(1 - \frac{1}{\log(i - g(i))}\right), \end{aligned}$$

by the induction hypothesis on  $Z_{i-g(i)}$ . Letting  $\chi_j$  be the indicator function of the event  $D_j$  for  $1 \leq j \leq t$ , the probability that at least two of the events  $D_j$  happen, given  $E_t$ , is lower bounded by:

$$\Pr \left[ \sum_{j=1}^t \chi_j \geq 2 \mid E_t \right] \geq \Pr \left[ \sum_{j=1}^{t/2} \chi_j \geq 1, \sum_{j=t/2+1}^t \chi_j \geq 1 \mid E_t \right] = \Pr \left[ \sum_{j=1}^{t/2} \chi_j \geq 1 \mid E_t \right]^2.$$

By union bound, we can write

$$\begin{aligned} \Pr \left[ \sum_{j=1}^{t/2} \chi_j \geq 1 \mid E_t \right] &\geq 1 - \prod_{i=1}^{t/2} (1 - \Pr[D_j \mid E_t]) \\ &\geq 1 - \left(1 - \frac{g(i)}{i} \left(1 - \frac{1}{\log(i - g(i))}\right)\right)^{t/2} \\ &\geq 1 - \exp \left[ -\frac{\alpha \log i}{4} \left(1 - \frac{1}{\log(i - g(i))}\right) \right] \\ &\geq 1 - \frac{1}{i^{\alpha/8}}, \end{aligned}$$

where the last step holds for  $i$  sufficiently large so that  $\log(i - g(i)) \geq 2$ . This implies that

$$\Pr \left[ \sum_{j=1}^t \chi_j \geq 2 \mid E_t \right] \geq \left(1 - \frac{1}{i^{\alpha/8}}\right)^2 \geq 1 - \frac{2}{i^{\alpha/8}}.$$

Therefore, we conclude that

$$\Pr[Z_i \geq 2 \cdot f(i - g(i))] \geq \Pr \left[ \sum_{j=1}^t \chi_j \geq 2 \right] \geq \Pr \left[ \sum_{j=1}^t \chi_j \geq 2 \mid E_t \right] \Pr[E_t] \geq \left(1 - \frac{2}{i^{\alpha/8}}\right) \left(1 - \frac{t}{i}\right) \geq 1 - \frac{1}{\log i},$$

where the last step holds by choosing  $\alpha$  sufficiently large. The claim now follows since  $2 \cdot f(i - g(i)) \geq f(i)$ .  $\blacksquare$

Note that any random walk starting at any node  $u \neq r^*$  has to exit  $T_n$  before hitting  $r^*$ . Therefore, an application of Lemma 3 to  $T_n$  yields a lower bound to the hitting time of  $r^*$  when starting at any node  $u \neq r^*$ .

**Corollary 1** *The hitting time of  $r^*$  of a random walk starting at any node  $u \neq r^*$  is  $2^{\Omega(n/\log^2 n)}$  with high probability.*

### Proof of Theorem 3.

**Figure 1. The bad graph.** The “bad” graph  $G_n$  for  $n = 3$ . One of the “bad” matchings of Theorem 3 is highlighted in red.

For  $t \geq 0$ , let  $\mathcal{M}(t)$  be the matching at the beginning of round  $t$  and assume  $\mathcal{M}(0) \in \mathcal{M}_1$ . To analyze the convergence to a perfect matching, we will consider on the event that  $\mathcal{M}(t) \notin \mathcal{M}_1$ . Note that in order for this event to happen, the bridge edge  $(a_{n+1}, b_n)$  of  $G_n$  will have to swap out of the matching. Let  $E(t)$  be the event that  $a_n$  requests  $b_n$  during round  $t$ . Similarly, let  $E'(t)$  be the event that  $b_{n+1}$  requests  $a_{n+1}$  during round  $t$ . Define the random variables

$$\begin{aligned}\tau_n &= \min\{t : E(t) \text{ happens}\}, \\ \tau'_n &= \min\{t : E'(t) \text{ happens}\}, \\ \tau_n^* &= \min\{\tau_n, \tau'_n\}.\end{aligned}$$

Then  $\tau_n^*$  is a lower bound on the number of rounds to reach the perfect matching. Lemma 4 below states that, for some  $c > 0$ ,

$$\Pr\left[\tau_n \leq 2^{cn/\log^2 n} \mid \tau_n \leq \tau'_n\right] = o(1) \quad \text{and} \quad \Pr\left[\tau'_n \leq 2^{cn/\log^2 n} \mid \tau'_n \leq \tau_n\right] = o(1).$$

Then the main theorem follows as

$$\begin{aligned}\Pr\left[\tau_n^* \leq 2^{cn/\log^2 n}\right] &= \Pr\left[\tau_n^* \leq 2^{cn/\log^2 n} \mid \tau_n \leq \tau'_n\right] \Pr[\tau_n \leq \tau'_n] + \Pr\left[\tau_n^* \leq 2^{cn/\log^2 n} \mid \tau'_n < \tau_n\right] \Pr[\tau'_n < \tau_n] \\ &= \Pr\left[\tau_n \leq 2^{cn/\log^2 n} \mid \tau_n \leq \tau'_n\right] \Pr[\tau_n \leq \tau'_n] + \Pr\left[\tau'_n \leq 2^{cn/\log^2 n} \mid \tau'_n < \tau_n\right] \Pr[\tau'_n < \tau_n] \\ &= o(1).\end{aligned}$$

#### Lemma 4

$$\Pr\left[\tau_n \leq 2^{cn/\log^2 n} \mid \tau_n \leq \tau'_n\right] = o(1) \quad \text{and} \quad \Pr\left[\tau'_n \leq 2^{cn/\log^2 n} \mid \tau'_n \leq \tau_n\right] = o(1).$$

**Proof.** We will prove the first bound. The second one follows by symmetry. Conditioning on the event that  $\tau_n \leq \tau'_n$ , we will analyze the matching in the upper half of  $G_n$  induced by  $\mathcal{M}(t)$ . Since  $\tau_n \leq \tau'_n$ ,  $\mathcal{M}(t) \in \mathcal{M}_1$  as long as  $E(t)$  does not happen. By Lemma 2, it is equivalent to study the Markov process  $\{(X(t), \mathcal{S}(t)), t \geq 0\}$  over  $\mathcal{P} \cup \{(\perp, \emptyset)\}$ , where  $(X(t), \mathcal{S}(t))$  is defined as the first marginal of  $\psi(\mathcal{M}(t))$ , and the additional state  $(\perp, \emptyset)$  is reached when the event  $E(t)$  happens. That is, conditioning on the event  $\tau_n \leq \tau'_n$ , it follows that

$$\tau_n = \min\{t : (X(t), \mathcal{S}(t)) = (\perp, \emptyset)\}. \quad (2)$$

If  $\tau_n \leq \tau'_n$  and  $(X(t), \mathcal{S}(t)) \neq (\perp, \emptyset)$ , all the neighbors of the unmatched node in the upper half of  $G_n$  are matched at the beginning of round  $t$ , and hence are *equally likely* to be requested during round  $t$ . Therefore, the Markov process  $(X(t), \mathcal{S}(t))$  has the following transition probabilities.

$$\Pr \left[ (X(t+1), \mathcal{S}(t+1)) = (x', S') \mid (X(t), \mathcal{S}(t)) = (x, S) \neq (\perp, \emptyset), \tau_n \leq \tau'_n \right] = \frac{1}{x},$$

for any

$$(x', S') \in \begin{cases} \{(x'', S \cup x) : x'' < x\} \cup \{(\min(S), S \setminus \min(S))\}, & \text{if } x < n \text{ (and } S \neq \emptyset) \\ \{(x'', S \cup x) : x'' < x\} \cup \{(\perp, \emptyset)\}, & \text{if } x = n \text{ (and } S = \emptyset) \end{cases}$$

The case  $(x', S') \in \{(x'', S \cup x) : x'' < x\}$  represents the scenario in which the unmatched node  $a_x$  requests a node through a non-horizontal edge: in this case, no progress is made as the unmatched node in the next round will be further away from  $a_n$ . If the unmatched node  $a_x$  requests the node on its horizontal edge, the next unmatched node will be closer to  $a_n$ . In the special case  $(x, S) = (n, \emptyset)$ , if the unmatched node requests the neighbor on its horizontal edge, then the bridge edge is swapped out of the matching and  $\mathcal{M}(t+1) \notin \mathcal{M}_1$ .

We will now show that the Markov chain  $\{(X(t), \mathcal{S}(t)), t \geq 0\}$  is equivalent to the random walk on  $T_n^*$ . For a node  $v$  of  $T_n^*$ , let  $x_v$  be its label and  $S_v$  be the set of labels of its ancestors. Define the function  $\phi$  from nodes of  $T_n^*$  to states of the chain as follows:

$$\phi(v) = \begin{cases} (\perp, \emptyset), & v = r^* \\ (x_v, S_v), & v \neq r^* \end{cases}$$

It is easy to verify that  $\phi$  is a bijection. Two nodes  $u$  and  $v$  are adjacent in  $T_n^*$  if and only if there is a nonzero transition probability between the states  $\phi(u)$  and  $\phi(v)$ . To see this, suppose there is a nonzero transition probability from  $(x_u, S_u)$  to  $(x_v, S_v)$  in the Markov chain. Let  $u = \phi^{-1}(x_u, S_u)$  and  $v = \phi^{-1}(x_v, S_v)$  be the corresponding nodes in  $T_n^*$ . There are two cases: (a) if  $x_v < x_u$  then  $S_v = S_u \cup x_u$ , and  $v$  is a child of  $u$ ; (b) if  $x_v > x_u$  then  $x_v = \min(S_u)$ ,  $S_v = S_u \setminus \min(S_u)$ , and  $v$  is the parent of  $u$ . The other direction is analogous. Therefore, conditioning on  $\tau_n \leq \tau'_n$  and  $(X(0), \mathcal{S}(0)) \neq (\perp, \emptyset)$ , we can conclude that  $\min\{t : (X(t), \mathcal{S}(t)) = (\perp, \emptyset)\}$  equals the hitting time of  $r^*$  for a random walk on  $T_n^*$  starting at the node  $\phi^{-1}(X(0), \mathcal{S}(0)) \neq r^*$ . The lemma follows by equation (2) and Corollary 1.  $\blacksquare$
